# Supplementary material
Source: PubMed Central journal article supplement (PMC4106375)
Supplement: Supp_Table1.pdf [file Supp_Table1.pdf]

## Supplementary Data

SUPPLEMENTARY TABLE S1. NUCLEOTIDE SEQUENCES OF PRIMERS USED FOR DIRECT SEQUENCING

| <i>Target</i>           | <i>Primers</i> | <i>Length (mer)</i> | <i>Amplicon (bp)</i> | <i>Nucleotide sequence</i> | <i>Temperature</i> |
|-------------------------|----------------|---------------------|----------------------|----------------------------|--------------------|
| <i>NRAS</i> codon 61    | fw             | 20                  | 149                  | GTGAAACCTGTTTGTGGAC        | 56°C               |
|                         | rv             | 20                  |                      | CCTGTAGAGGTTAATATCCG       |                    |
| <i>NRAS</i> codon 12/13 | fw             | 21                  | 176                  | CTTGCTGGTGTGAAATGACTG      | 53~57°C            |
|                         | rv             | 20                  |                      | TCCGACAAGTGAGAGACAGG       |                    |
| <i>HRAS</i> codon 61    | fw             | 19                  | 154                  | GGAGACGTGCCTGTTGGAC        | 56°C               |
|                         | rv             | 20                  |                      | GGTTCACCTGTACTGGTGGGA      |                    |
| <i>HRAS</i> codon 12/13 | fw             | 19                  | 129                  | CTGAGGAGCGATGACGGAA        | 55~58°C            |
|                         | rv             | 20                  |                      | AGGCTCACCTCTATAGTGGG       |                    |
| <i>KRAS</i> codon 61    | fw             | 21                  | 135                  | GTTTCTCCCTTCTCAGGATTC      | 56°C               |
|                         | rv             | 18                  |                      | CCCTCCCCAGTCCTCATG         |                    |
| <i>KRAS</i> codon 12/13 | fw             | 21                  | 165                  | AAGGCCTGCTGAAAATGACTG      | 60~65°C            |
|                         | rv             | 22                  |                      | GGTCCTGCACCAGTAATATGCA     |                    |

fw, forward primer; rv, reverse primer; bp, base pairs.
