# Supplementary material
Source: PubMed Central journal article supplement (PMC4106375)
Supplement: Supp_Table2.pdf [file Supp_Table2.pdf]

SUPPLEMENTARY TABLE S2. CHARACTERISTICS OF PATIENTS WITH FOLLICULAR THYROID CARCINOMA AND DISTANT METASTASIS

| No                           | Age | Sex | Time to metastasis          | Sites of metastasis | RAI avidity | Other Tx                | RAS mutation <sup>a</sup> | Survival year and status |
|------------------------------|-----|-----|-----------------------------|---------------------|-------------|-------------------------|---------------------------|--------------------------|
| <i>RAS mutation positive</i> |     |     |                             |                     |             |                         |                           |                          |
| 1                            | 65  | F   | Synchronous                 | Lung                | Refractory  | None                    | NRAS Q61R                 | 5.8 Alive                |
| 2                            | 82  | F   | Synchronous                 | Lung                | Avid        | None                    | NRAS Q61R                 | 1.3 Expired              |
| 3                            | 45  | F   | Synchronous                 | Lung                | Avid        | None                    | NRAS Q61R                 | 14.6 Alive               |
| 4                            | 66  | F   | Synchronous                 | Bone                | Avid        | EBRT                    | NRAS Q61R                 | 3.1 Alive                |
| 5                            | 67  | F   | Synchronous                 | Lung, bone          | Refractory  | EBRT                    | NRAS Q61R                 | 3.4 Alive                |
| 6                            | 74  | F   | Synchronous                 | Bone                | Avid        | None                    | NRAS Q61R                 | 7.9 Alive                |
| 7                            | 47  | M   | Synchronous                 | Bone                | Avid        | None                    | NRAS Q61K                 | 3.2 Alive                |
| 8                            | 67  | M   | Synchronous                 | Lung, bone          | Avid        | None                    | NRAS Q61R                 | 6.7 Alive                |
| 9                            | 61  | F   | Metachronous<br>(1 year)    | Lung, bone          | Avid        | EBRT                    | NRAS Q61K                 | 9.9 Expired              |
| 10                           | 70  | F   | Synchronous                 | Multiple            | Refractory  | EBRT                    | NRAS Q61R                 | 5.3 Alive                |
| 11                           | 73  | F   | Synchronous                 | Multiple            | Avid        | EBRT,<br>docetaxel      | NRAS Q61K                 | 5.7 Expired              |
| 12                           | 42  | F   | Synchronous                 | Lung                | Avid        | None                    | NRAS Q61R                 | 8.5 Alive                |
| 13                           | 54  | F   | Metachronous<br>(1.6 years) | Lung                | Refractory  | Lenvatinib <sup>b</sup> | NRAS Q61K                 | 4.8 Alive                |
| 14                           | 77  | F   | Metachronous<br>(3.8 years) | Lung                | Refractory  | None                    | HRAS Q61R                 | 7.5 Alive                |
| 15                           | 69  | F   | Metachronous<br>(8.3 years) | Multiple            | Avid        | EBRT                    | HRAS Q61K                 | 12.8 Expired             |
| 16                           | 60  | M   | Synchronous                 | Bone                | Avid        | EBRT                    | KRAS Q61R                 | 15.6 Alive               |
| 17                           | 69  | F   | Synchronous                 | Bone                | Avid        | EBRT                    | KRAS Q61R                 | 2.8 Alive                |
| <i>RAS mutation negative</i> |     |     |                             |                     |             |                         |                           |                          |
| 18                           | 67  | F   | Synchronous                 | Lung                | Refractory  | None                    | NA                        | 2.9 Alive                |
| 19                           | 67  | M   | Metachronous<br>(1.1 years) | Lung, bone          | Avid        | None                    | NA                        | 7.2 Expired              |
| 20                           | 48  | M   | Metachronous<br>(3.9 years) | Lung, bone          | Avid        | Sorafenib               | NA                        | 8.8 Alive                |
| 21                           | 71  | F   | Synchronous                 | Lung, bone          | Avid        | Capecitabine            | NA                        | 6.6 Expired              |
| 22                           | 53  | F   | Synchronous                 | Lung, bone          | Avid        | None                    | NA                        | 6.8 Alive                |
| 23                           | 55  | F   | Synchronous                 | Lung, bone          | Avid        | Paclitaxel              | NA                        | 3.8 Expired              |
| 24                           | 60  | F   | Synchronous                 | Lung, bone          | Avid        | EBRT                    | NA                        | 4.9 Alive                |
| 25                           | 80  | F   | Synchronous                 | Multiple            | Refractory  | EBRT                    | NA                        | 6.3 Expired              |
| 26                           | 80  | F   | Synchronous                 | Multiple            | Avid        | EBRT                    | NA                        | 2.8 Expired              |
| 27                           | 62  | M   | Metachronous<br>(8.0 years) | Lung                | Refractory  | None                    | NA                        | 9.8 Alive                |
| 28                           | 47  | F   | Synchronous                 | Multiple            | Avid        | None                    | NA                        | 0.8 Alive                |

<sup>a</sup>Amino acids: Q, glutamine; R, arginine; K, lysine.

<sup>b</sup>She participated in a randomized controlled phase-3 study of lenvatinib vs. placebo since September 2012. EBRT, external beam radiation therapy; F, female; F/U, follow up; M, male; NA, not applicable; No, number; RAI, radioactive iodine; Tx, treatment.
