# Supplementary material
Source: PubMed Central journal article supplement (PMC4106375)
Supplement: Supp_Table3.pdf [file Supp_Table3.pdf]

SUPPLEMENTARY TABLE S3. OVERALL POINT  
MUTATIONS OF THE *RAS* GENES

|                         | <i>Amino acid*</i> | <i>Nucleotide</i> | <i>No. of mutations</i> |
|-------------------------|--------------------|-------------------|-------------------------|
| <i>NRAS</i> codon 61    | Q61R               | CAA>CGA           | 16                      |
|                         | Q61K               | CAA>AAA           | 5                       |
| <i>HRAS</i> codon 61    | Q61R               | CAG>CGG           | 6                       |
|                         | Q61K               | CAG>AAG           | 1                       |
| <i>KRAS</i> codon 12/13 | G12R               | GGT>CGT           | 5                       |
|                         | G12V               | GGT>GTT           | 1                       |
| <i>KRAS</i> codon 61    | Q61R               | CAA>CGA           | 4                       |
| <i>NRAS</i> codon 12/13 | G12W               | GGT>TGG           | 1                       |
| <i>HRAS</i> codon 12/13 | G12                | GGC               | 0                       |

\*Amino acids: Q, glutamine; R, arginine; K, lysine; G, glycine; V, valine; W, tryptophan.
