# Supplementary material
Source: PubMed Central journal article supplement (PMC4106375)
Supplement: Supp_Table4.pdf [file Supp_Table4.pdf]

SUPPLEMENT TABLE S4. A COMPARISON OF CLINICOPATHOLOGICAL FEATURES IN FTC PATIENTS ACCORDING TO THE *RAS* MUTATION STATUS

|                            | <i>Total</i>         | <i>Wild</i>          | <i>RAS mutant</i>    | <i>p-Value</i> |
|----------------------------|----------------------|----------------------|----------------------|----------------|
| Patient, n/total (%)       | 56/56 (100)          | 25/56 (45)           | 31/56 (55)           | -              |
| Age, mean (range)          | 56.8 (34–82)         | 56.1 (34–80)         | 57.5 (34–82)         | 0.16           |
| Sex, female                | 48/56 (86)           | 20/25 (80)           | 28/31 (90)           | 0.45           |
| Tumor                      |                      |                      |                      |                |
| mean size ± SD, cm (range) | 4.4 ± 2.5 (0.5–15.0) | 4.6 ± 2.7 (0.5–12.0) | 4.2 ± 2.5 (1.7–15.0) | 0.27           |
| Widely invasive FTC        | 11/56 (20)           | 4/25 (16)            | 7/31 (23)            | 0.74           |
| Lymph node metastasis      | 3/56 (5)             | 2/25 (8)             | 1/31 (3)             | 0.52           |
| Distant metastasis         | 28/56 (50)           | 11/25 (44)           | 17/31 (55)           | 0.59           |
| RAI treatment              | 48/56 (86)           | 22/25 (88)           | 26/31 (84)           | 0.72           |
| Mortality                  | 9/56 (16)            | 5/25 (20)            | 4/31 (13)            | 0.72           |

n, number; SD, standard deviation; RAI, radioactive iodine.
